# Supplementary figures and images for: Crystal structure of Cex1p reveals the mechanism of tRNA trafficking between nucleus and cytoplasm
Source: PubMed Central journal article supplement — Nucleic Acids Res. 2013 Feb 7;41(6):3901–14. doi: 10.1093/nar/gkt010 (PMC3616705; doi:10.1093/nar/gkt010), 2013-02-07

**a**

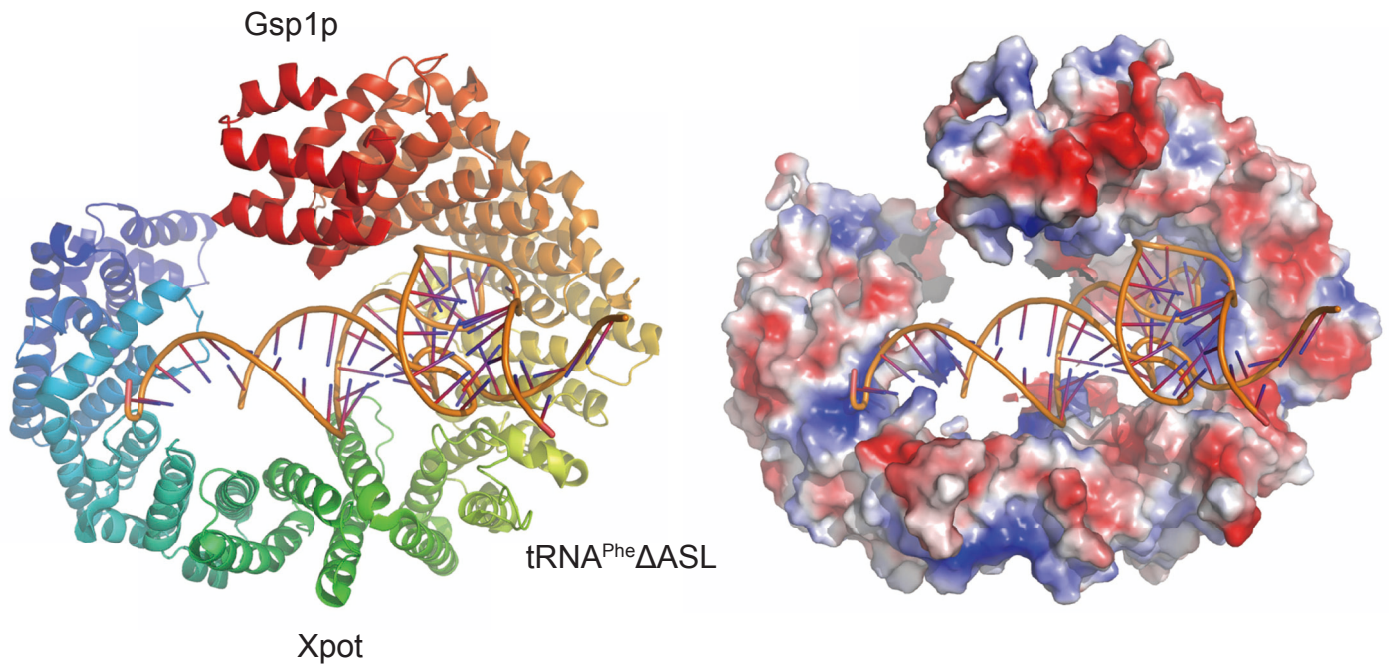

**b**

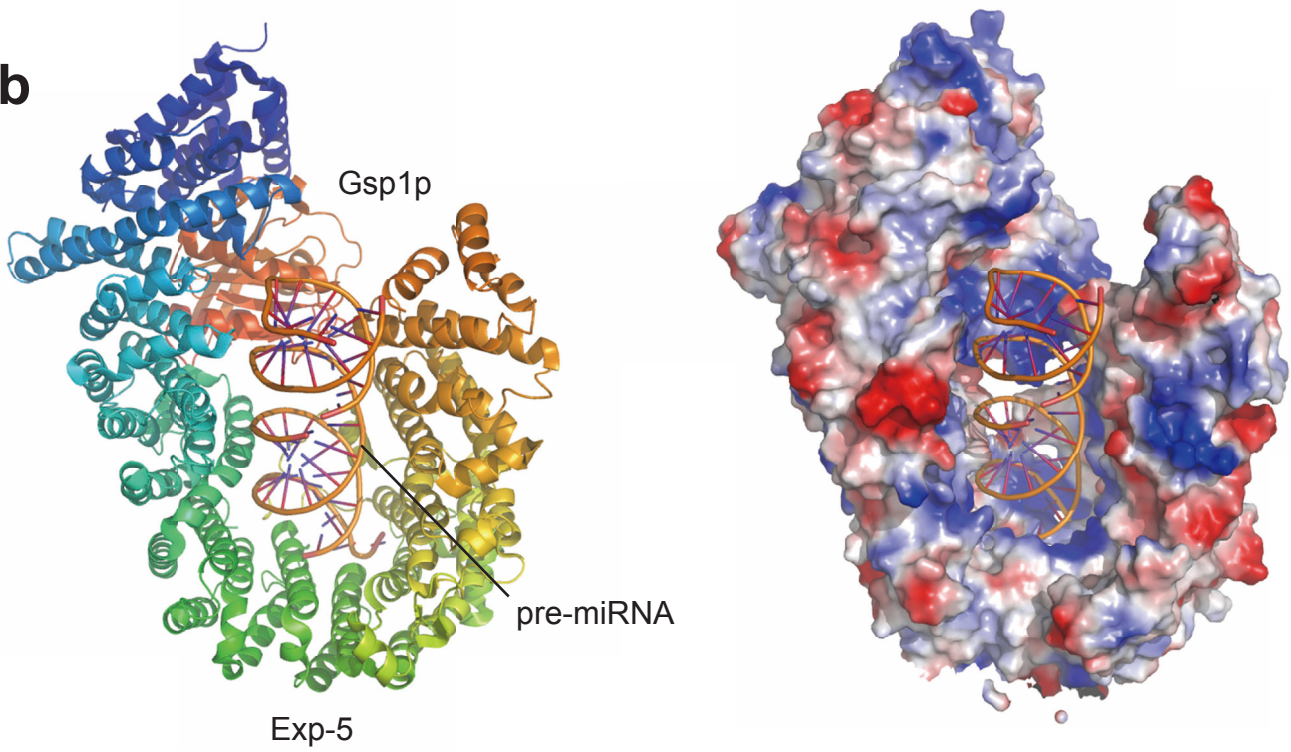

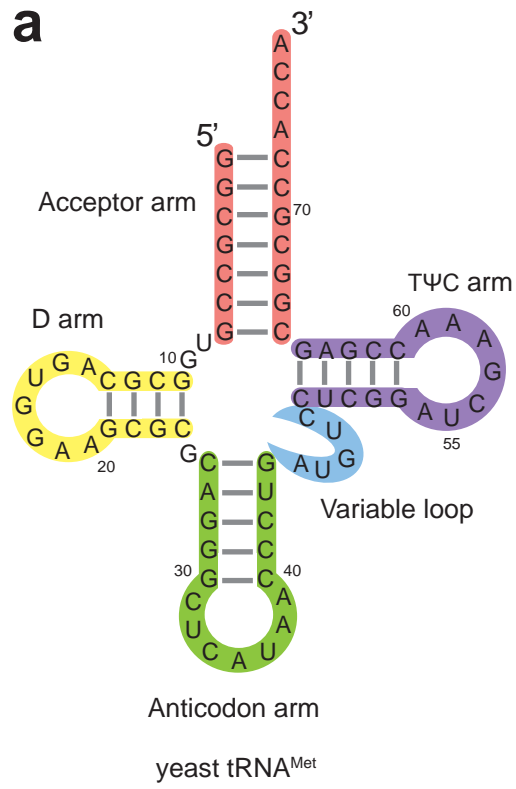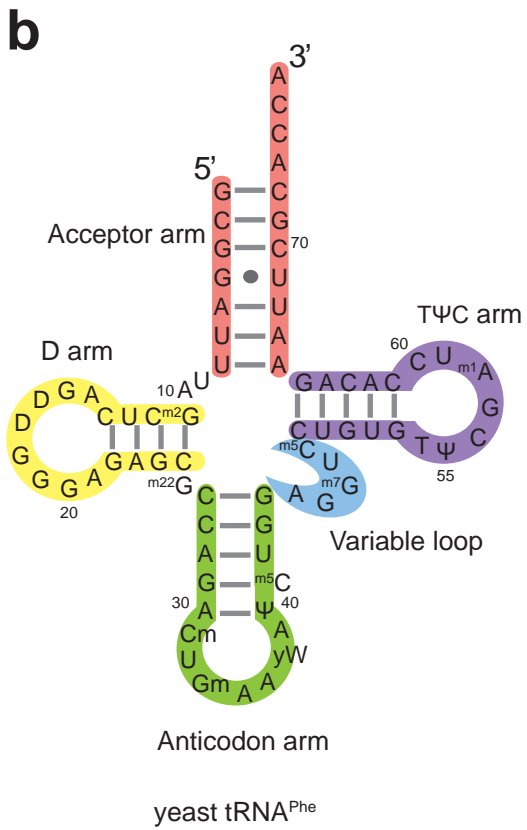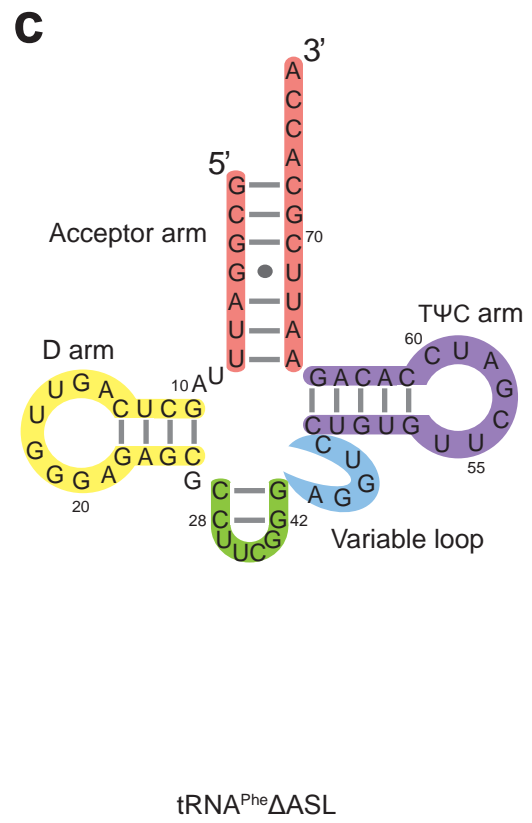



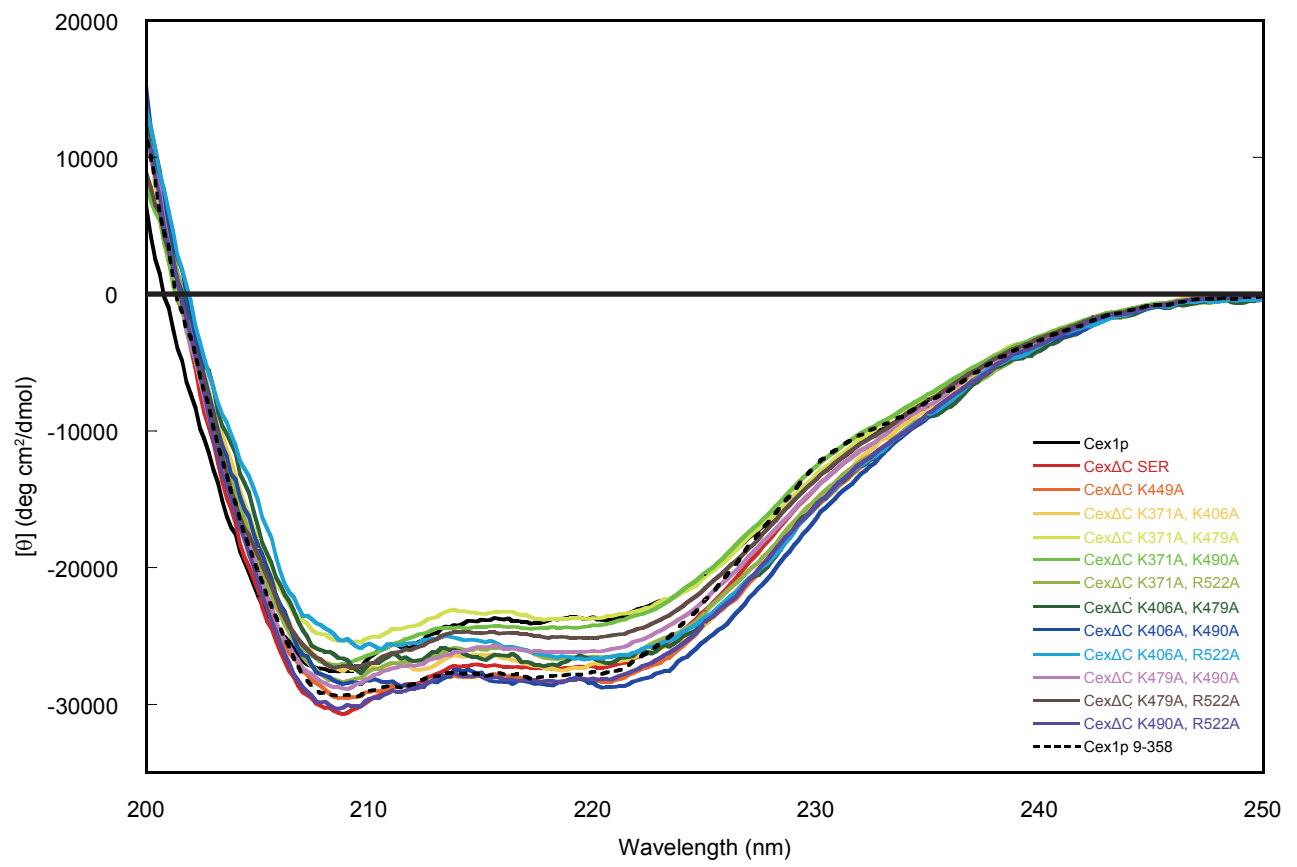

Nozawa *et al.*, Sup. Fig. 4

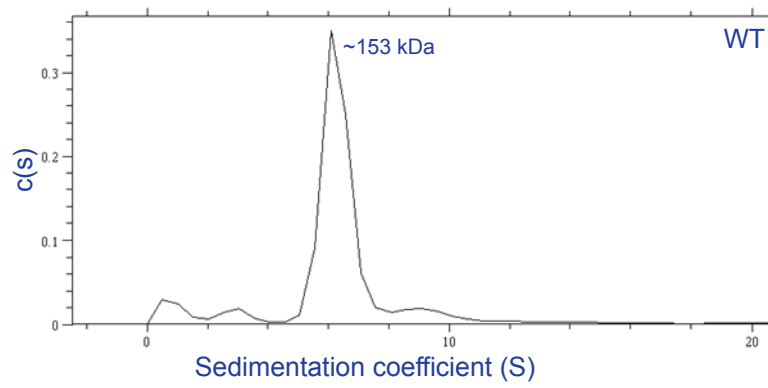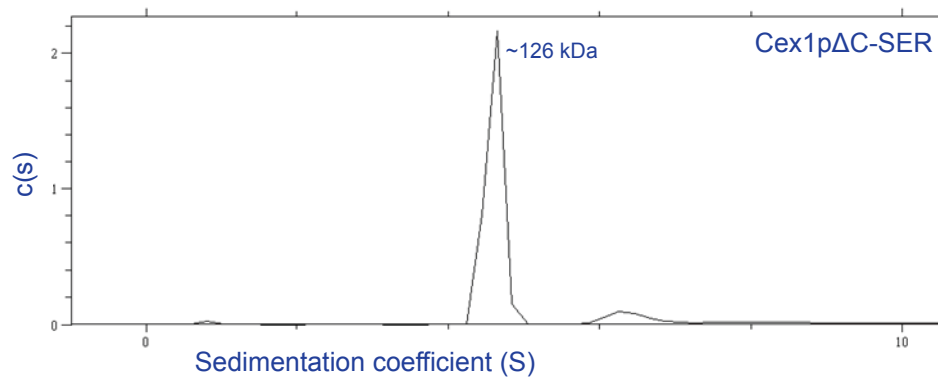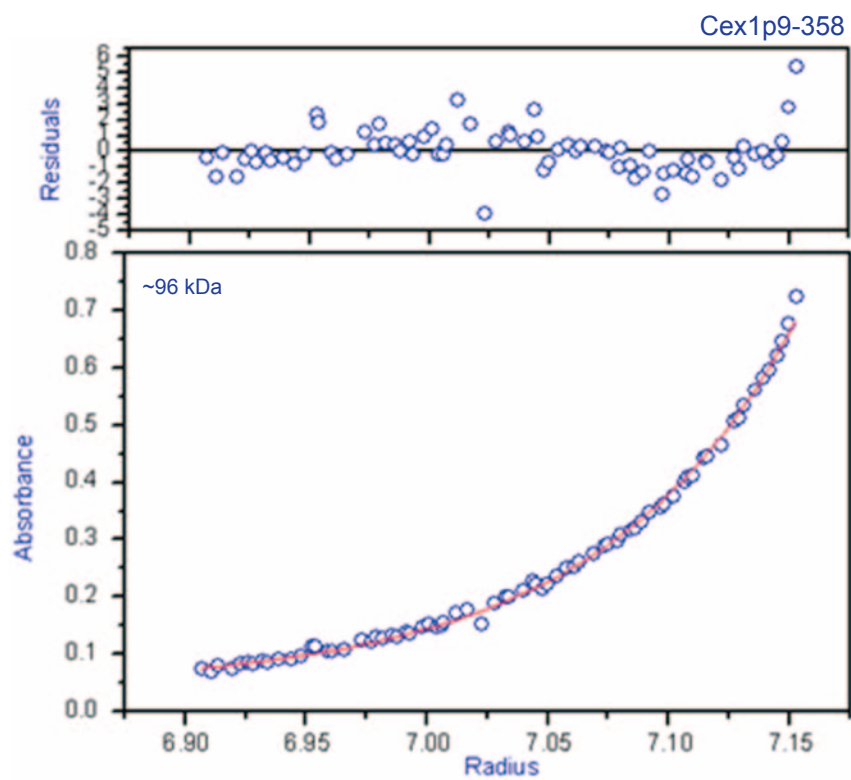

Nozawa *et al.*, Sup. Fig. 5

Supplement: supp_gkt010_nar-02555-r-2012-File003.pdf [file supp_gkt010_nar-02555-r-2012-File003.pdf]
